# Supplementary material for: Ammonia-lowering activities and carbamoyl phosphate synthetase 1 (Cps1) induction mechanism of a natural flavonoid
Source: PubMed Central journal article supplement (PMC4465466; doi:10.1186/s12986-015-0020-7), 2015-06-09

**Additional File**

Including Supplementary Tables S1-3, Supplementary figure legends and Supplementary Figures S1-3

**Ammonia-lowering activities and carbamoyl phosphate synthetase 1 (Cps1)  
induction mechanism of a natural flavonoid**

Kazunari Nohara<sup>1a</sup>, Youngmin Shin<sup>1a</sup>, Noheon Park<sup>2</sup>, Kwon Jeong<sup>1</sup>, Baokun He<sup>1</sup>, Nobuya Koike<sup>3</sup>, Seung-Hee Yoo<sup>1</sup>, Zheng Chen<sup>1\*</sup>

<sup>1</sup>Department of Biochemistry and Molecular Biology, The University of Texas Health Science Center at Houston, Houston, TX 77030, USA; <sup>2</sup>Department of Neuroscience,

The University of Texas Southwestern Medical Center, Dallas, TX 75390, USA;

<sup>3</sup>Department of Physiology and Systems Bioscience, Kyoto Prefectural University of Medicine, Kyoto, 602-8566, Japan.

<sup>a</sup>These authors contributed equally.

**Running title:** Ammonia control and urea cycle regulation by a flavonoid

\*Corresponding author: Zheng Chen, Department of Biochemistry and Molecular Biology, The University of Texas Health Science Center at Houston, 6431 Fannin Street, MSB 6.200, Houston, TX 77030, USA. Tel.: 713-500-6284; Fax: 713-500-0652; E-mail:

[zheng.chen.1@uth.tmc.edu](mailto:zheng.chen.1@uth.tmc.edu) .

**Supplementary Table S1:** Primers for construction of reporter constructs.

| Name        | Sequence                                             |
|-------------|------------------------------------------------------|
| pF          | 5'-GGCCCCGGGAGATCTGGAGATACACAGTAAATT-3'              |
| pR          | 5'-GGCCCATGGCAGCTCCTCCTTTCTTAGCCCT-3'                |
| P-C/EBPmutF | 5'-GAGAAGGTGCCACTTGTTATATTATGATTTGTATGACATGTCCATT-3' |
| P-C/EBPmutR | 5'-AATGGACATGTCATACAAATCATAATATAACAAGTGGCACCTTCTC-3' |
| dF          | 5'-GGCCCCGGGCAGTTTCCGAGAATCTGAAACACA-3'              |
| dR          | 5'-GGCCCATGGTTTGAAAACAGCAAATTCATCAGC-3'              |

**Supplementary Table S2:** Primers for real-time qPCR analysis.

| Target genes | Forward primer                 | Reverse primer                |
|--------------|--------------------------------|-------------------------------|
| GAPDH        | 5'-CAAGGTCATCCATGACAACCTTTG-3' | 5'-GGCCATCCACAGTCTTCTGG-3'    |
| <i>Cps1</i>  | 5'-CACCAATTTCCAGGTGACCA-3'     | 5'-TACTGCTTTAGGCGGCCTTT-3'    |
| <i>Otc</i>   | 5'-AGGGTCACACTTCTGTGGTTC-3'    | 5'-CAGAGAGCCATAGCATGTACTG-3'  |
| <i>Ass1</i>  | 5'-ACACCTCCTGCATCCTCGT-3'      | 5'-GCTCACATCCTCAATGAACACCT-3' |
| <i>Asl</i>   | 5'-CTATGACCGGCATCTGTGGAA-3'    | 5'-AGCAACCTTGTCCAACCTTG-3'    |
| <i>Arg1</i>  | 5'-TTGGGTGGATGCTCACACTG-3'     | 5'-GTACACGATGTCTTTGGCAGA-3'   |
| <i>Cebpa</i> | 5'-CAAGAACAGCAACGAGTACCG-3'    | 5'-GTCACTGGTCAACTCCAGCAC-3'   |
| <i>Cebpb</i> | 5'- ACCGGGTTTCGGGACTTGA -3'    | 5'- GTTGCGTAGTCCCGTGTCCA -3'  |

**Supplementary Table S3:** Mass spectrometry data table for the 164KD band shown in the Supplemental Figure 1B.

| Accession | Description                                                                      | Score    | Coverage | Unique Peptides | PSMs | MW [kDa] |
|-----------|----------------------------------------------------------------------------------|----------|----------|-----------------|------|----------|
| 124248512 | carbamoyl-phosphate synthetase [ammonia], mitochondrial precursor [Mus musculus] | 13654.31 | 66.47    | 106             | 778  | 164.5    |
| 124486747 | glycogen debranching enzyme [Mus musculus]                                       | 1273.25  | 36.88    | 54              | 85   | 174.2    |
| 146219837 | eukaryotic translation initiation factor 3 subunit A [Mus musculus]              | 870.20   | 35.04    | 49              | 69   | 161.8    |
| 19527028  | vigilin [Mus musculus]                                                           | 1147.90  | 38.17    | 45              | 78   | 141.7    |
| 93102409  | fatty acid synthase [Mus musculus]                                               | 614.67   | 13.50    | 29              | 31   | 272.3    |
| 110347469 | alpha-2-macroglobulin precursor [Mus musculus]                                   | 631.93   | 23.68    | 27              | 47   | 165.7    |
| 114205420 | aldehyde oxidase 3 [Mus musculus]                                                | 862.84   | 21.95    | 25              | 37   | 146.8    |
| 77682555  | xanthine dehydrogenase/oxidase [Mus musculus]                                    | 704.11   | 19.70    | 25              | 39   | 146.5    |
| 254553372 | isoleucine--tRNA ligase, cytoplasmic [Mus musculus]                              | 342.94   | 22.98    | 25              | 28   | 144.2    |

**Supplementary figure legends:**

**Supplementary Figure S1. NOB modulates CPS1 expression.** (A) Quantification of CPS1 protein levels from three independent experiments including the blot shown in Fig. 2A. RC, regular chow; HFD, high-fat diet; Veh, vehicle; NOB, Nobiletin. Two-way ANOVA with Bonferroni *post-hoc* tests shows significant statistical differences between HFD.Veh and other three groups ( $p < 0.0001$ ). Furthermore, one-way ANOVA with Bonferroni tests shows significant difference ( $p < 0.05$ ) between ZT time points in RC.Veh but not in other groups. (B) Coomassie blue staining of CPS1. Mouse liver protein lysates were separated on SDS-PAGE gel and stained with Coomassie blue. The predominant 164KD band was validated by mass spectrometry as CPS1 (Table S3). (C) Control microscopy images for Figure 2B using rabbit IgG.

**Supplementary Figure S2. NOB rescued C/EBP protein circadian expression in the liver from HFD fed mice.** (A) Quantification of C/EBP $\alpha$  p42 protein levels from three independent experiments including the blot shown in Figure 3B. Two-way ANOVA with Bonferroni *post-hoc* tests shows significant difference between RC.Veh and HFD.Veh ( $p < 0.05$ ), indicating diet effect on the C/EBP $\alpha$  p42 expression level. Importantly, RC.NOB was not significantly different from HFD.NOB, suggesting NOB reversed the reducing effect of HFD on the C/EBP $\alpha$  p42 expression. (B) Quantification of C/EBP $\alpha$  p30 protein levels from three independent experiments including the blot shown in Figure 3B. Two-way ANOVA with Bonferroni *post-hoc* tests shows significant difference between RC.Veh and HFD.Veh ( $p < 0.01$ ), but RC.NOB and HFD.NOB was not significantly different, again suggesting NOB reversed the reducing effect of HFD on the p30 expression. (C) Quantification of C/EBP $\beta$  protein levels from three independent experiments including the blot shown in Figure 3B. Two-way ANOVA with Bonferroni *post-hoc* tests shows significant difference between RC.Veh and HFD.Veh ( $p < 0.0001$ ), but RC.NOB and HFD.NOB was not significantly different.

**Supplementary Figure S3. NOB restored CPS1 and C/EBP protein levels in a clock-dependent manner.** (A) Quantification of CPS1 protein levels under constant darkness (DD) conditions from three independent experiments including the blot shown in Figure 6A. Two-way ANOVA with Bonferroni *post-hoc* tests shows significant statistical difference between WT and Clk (*Clock*<sup>*Δ19/Δ19*</sup>) ( $p < 0.0001$ ). (B) Quantification of C/EBP $\alpha$  p42 protein levels under constant darkness (DD) conditions from three independent experiments including the blot shown in Figure 6A. Two-way ANOVA with Bonferroni *post-hoc* tests shows significant statistical differences between WT and Clk ( $p < 0.05$ ). (C) Quantification of C/EBP $\alpha$  p30 protein levels under constant darkness (DD) conditions from three independent experiments including the blot shown in Figure 6A. Two-way ANOVA with Bonferroni *post-hoc* tests shows significant statistical difference between WT and Clk ( $p < 0.01$ ). (D) Quantification of C/EBP $\beta$  protein levels under constant darkness (DD) conditions from three independent experiments including the blot shown in Figure 6A. Two-way ANOVA with Bonferroni *post-hoc* tests shows significant statistical difference between WT and Clk ( $p < 0.05$ ).

A

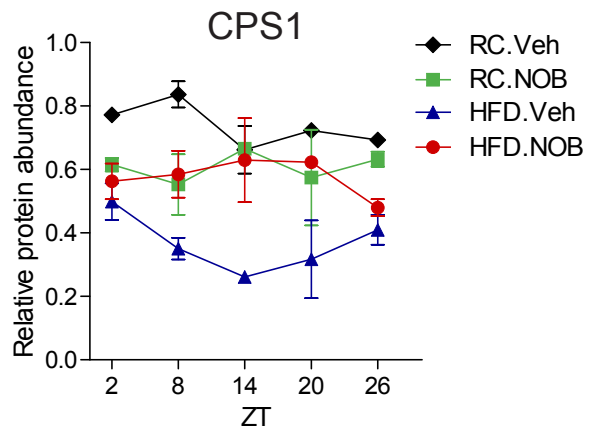

B

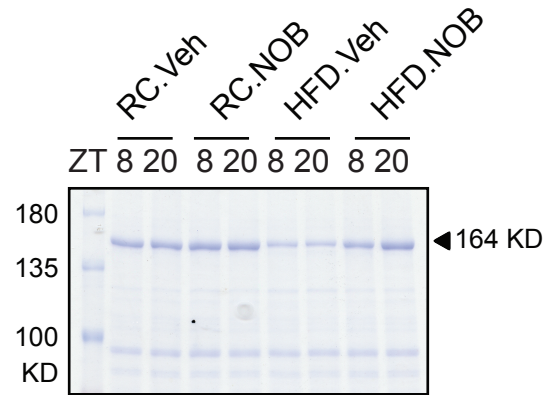

C

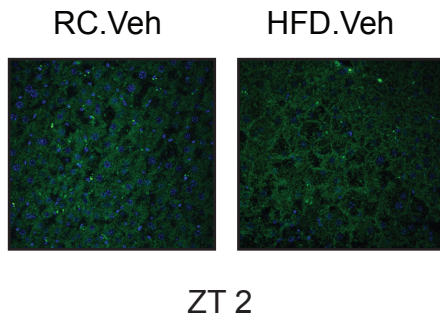

A

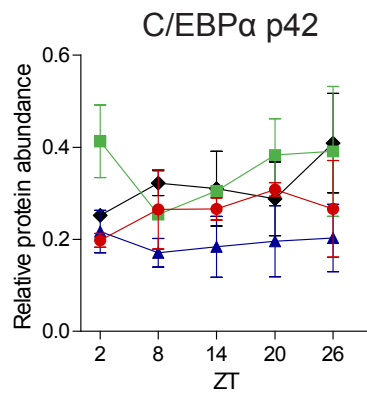

B

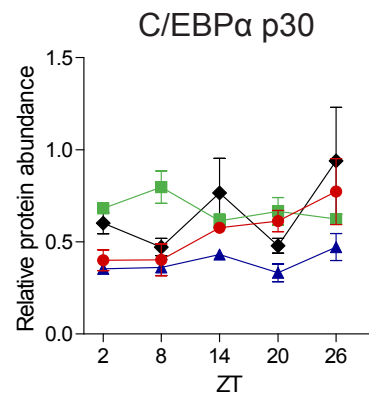

C

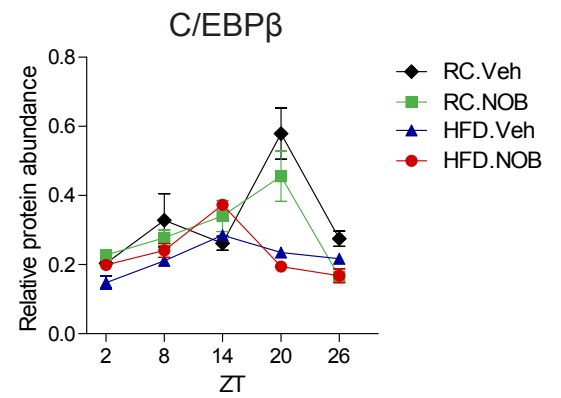

A

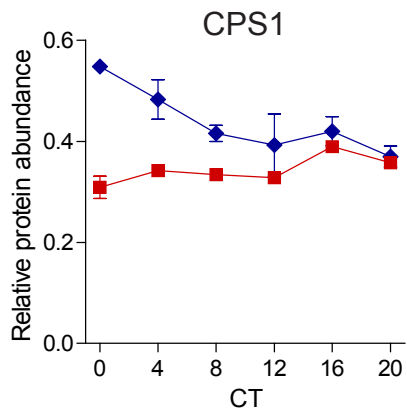

B

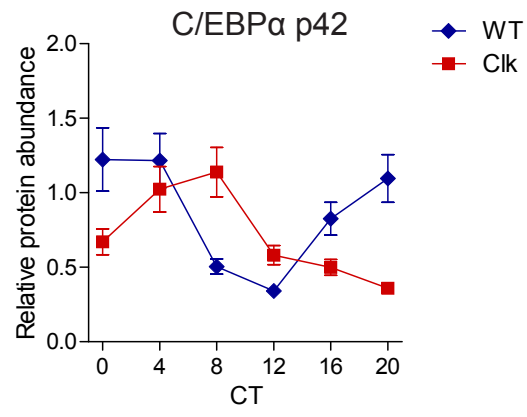

C

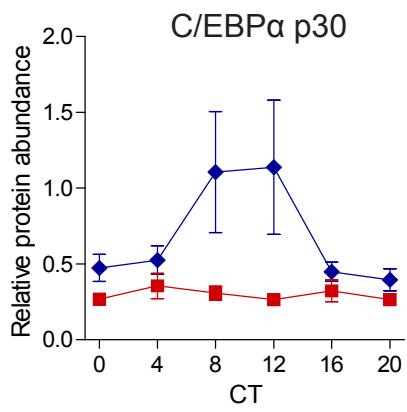

D

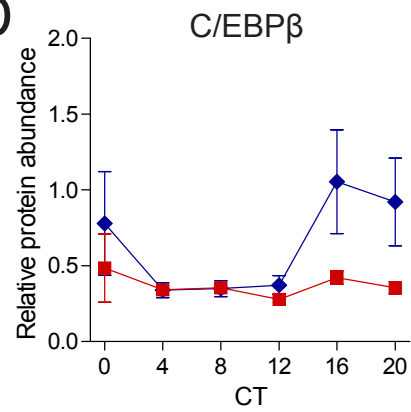

Supplement: 12986_2015_20_MOESM1_ESM.pdf [file 12986_2015_20_MOESM1_ESM.pdf]
